# Supplementary material for: Synthesis, antibacterial and antioxidant properties of novel ethylenoindolophanes – a new class of cyclophanes
Source: Royal Society of Chemistry journal article supplement (doi:10.1039/c4ra00303a), 2014-01-01
Supplement: c4ra00303a1.pdf [file c4ra00303a1.pdf]

## Supporting Information

### **Synthesis, antibacterial and antioxidant properties of novel ethylenoindolophanes - A new class of cyclophanes**

**Perumal Rajakumar <sup>a,\*</sup>, Nagarathinam Venkatesan <sup>a</sup> and Gunasekaran Mohanraj <sup>b</sup>**

**Department of Organic Chemistry, University of Madras, Guindy Campus, Chennai 600 025, India.**

**Center for Advanced Studies in Botany, University of Madras, Guindy Campus, Chennai 600 025, India.**

Experimental procedure.....S2

<sup>1</sup>H and <sup>13</sup>C NMR spectrum of Synthesized Ethylenophanes.....S4

## EXPERIMENTAL

### Materials method

All the reagents and solvents employed were of the best grade available and were used without further purification. The melting points were determined using a Toshniwal melting point apparatus by open capillary tube method and were uncorrected.  $^1\text{H}$  NMR and  $^{13}\text{C}$  NMR spectra were recorded on BRUKER 300 MHz instruments. Tetramethylsilane (TMS) was used as the internal standard. MS: EI-MS spectra on Jeol DX-303 mass spectrometer. The elemental analyses for the compounds were carried out using the Perkin-Elmer 240B elemental analyzer. Column chromatography was performed on silica gel (ACME, 100–200 mesh). Routine monitoring of the reaction was made using thin layer chromatography developed on glass plates coated with silica gel-G (ACME) of 25 mm thickness and visualized with iodine.

### General procedure for synthesis of precyclophane by *N*-arylation of indole

To a mixture of CuI (1.26 mmol),  $\text{K}_3\text{PO}_4$  (6.00 mmol), trans-1,2-diaminocyclohexane (0.12 mmol) and indole (1.26 mmol) in toluene (150 mL) were added aryl dibromide (0.6 mmol) under nitrogen atmosphere. The reaction mixture was refluxed at 110 °C for 24 h. After the reaction was completed, the solvent was removed under reduced pressure and the residue was extracted with  $\text{CHCl}_3$  (3 x 100 mL), washed with water (2 x 100 mL), brine (150 mL) and dried over anhydrous  $\text{Na}_2\text{SO}_4$ . The solvent was removed and crude product was purified by column chromatography on silica gel using  $\text{CHCl}_3$ /Hexane (1:4, v/v) as eluent.

### General procedure for synthesis of dialdehyde

To a stirred solution of dimethylformamide (19.9 mmol) at 0 °C, added phosphorous oxychloride (5.0 mmol) drop wise under nitrogen atmosphere. Bis-indole (2.3 mmol) in dimethylformamide (5.9 mmol) was then added to the reaction at 0 °C to 10 °C. After the completion of addition, the reaction mixture was allow to attain room temperature and then stirred for additional one hour at 35 °C. The reaction was then quenched by adding crushed ice (100 g) and further water (100 ml). Then the reaction mixture was then treated thrice with NaOH solution (1 M). The reaction mixture was heated after adding one portion of NaOH solution and the rest of the two portions were added later with stirring. The reaction mixture was then kept in refrigerator overnight. The precipitate obtained was collected by filtration and then dissolved in chloroform (2 x 100 mL). The organic layer was then dried over ( $\text{Na}_2\text{SO}_4$ ), filtered and solvent was evaporated under reduced pressure to give the residue which was then chromatographed over  $\text{SiO}_2$  using chloroform: methanol (99:1) as eluting solvent to give the corresponding dialdehyde.

### General procedure for McMurray coupling (synthesis of ethylenophanes [1 – 4])

A solution of low valent titanium prepared from  $\text{TiCl}_4$  (20 equiv.) with zinc (40 equiv.) and two drops of pyridine in dry THF (200 mL) under nitrogen atmosphere at 0 °C and was allowed to attain room temperature after 0.5 h and then refluxed for 1 h. Dialdehyde (1 equiv.) was added in one batch to the freshly prepared low valent titanium. After the addition was over the reaction mixture was refluxed overnight. The reaction mixture was then cooled and quenched with saturated  $\text{K}_2\text{CO}_3$  solution. The precipitated inorganic material was removed by filtration. The precipitate was thoroughly washed with THF for several times and the combined THF extract on evaporation under reduced pressure gave the residue, which was extracted with  $\text{CHCl}_3$  (100 mL), washed with water (2 x 100 mL) brine (100 mL) and dried over anhydrous  $\text{Na}_2\text{SO}_4$ . Crude product obtained after evaporation of  $\text{CHCl}_3$ , was purified by column chromatography using  $\text{CHCl}_3$ /Hexane (1:4, v/v) as eluent.

**Precyclophane 9:** Yield 82%; mp 109-111 °C; <sup>1</sup>H NMR (300 MHz, CDCl<sub>3</sub>): δ (ppm) 2.52 (s, 3H); 6.70 (d, 2H, *J* = 3.3 Hz); 7.16-7.27 (m, 4H); 7.32 (s, 2H); 7.36 (d, 2H, *J* = 3.3 Hz); 7.47 (s, 1H); 7.63 (d, 2H, *J* = 8.1 Hz); 7.69 (d, 2H, *J* = 7.5 Hz). <sup>13</sup>C NMR (75 MHz, CDCl<sub>3</sub>): δ (ppm) 21.6, 104.1, 110.5, 117.1, 120.6, 121.3, 122.6, 122.7, 127.8, 129.5, 135.7, 140.9, 141.2. EI-MS (*m/z*): 322 (M<sup>+</sup>). Elemental Anal. Calcd for C<sub>23</sub>H<sub>18</sub>N<sub>2</sub>: C, 85.68; H, 5.63; N, 8.69. Found: C, 85.76; H, 5.50; N, 8.74.

**Precyclophane 9a:** Yield 85%; mp 95-97 °C; <sup>1</sup>H NMR (300 MHz, CDCl<sub>3</sub>): δ (ppm) 2.43 (s, 3H); 2.92 (s, 3H); 6.70 (d, 2H, *J* = 3.3 Hz); 7.15-7.26 (m, 4H); 7.31 (s, 2H); 7.36 (d, 2H, *J* = 3.3 Hz); 7.41 (d, 2H, *J* = 8.1 Hz); 7.68 (d, 2H, *J* = 7.8 Hz). <sup>13</sup>C NMR (75 MHz, CDCl<sub>3</sub>): δ (ppm) 20.8, 60.6, 103.5, 110.7, 120.4, 120.9, 122.3, 127.3, 128.8, 129.0, 133.2, 134.2, 136.6, 148.3. EI-MS (*m/z*): 352 (M<sup>+</sup>). Elemental Anal. Calcd for C<sub>24</sub>H<sub>20</sub>N<sub>2</sub>O: C, 81.79; H, 5.72; N, 7.95. Found: C, 81.94; H, 5.80; N, 7.76.

**Precyclophane 10:** Yield 73%; mp 167-169 °C; <sup>1</sup>H NMR (300 MHz, CDCl<sub>3</sub>): δ (ppm) 6.75 (d, 2H, *J* = 3.3 Hz); 7.20-7.29 (m, 4H); 7.31 (s, 1H); 7.34 (s, 1H); 7.68 (d, 2H, *J* = 8.1 Hz); 7.81 (d, 2H, *J* = 3.6 Hz); 7.91 (t, 1H, *J* = 8.1 Hz); 8.31 (d, 2H, *J* = 8.1 Hz). <sup>13</sup>C NMR (75 MHz, CDCl<sub>3</sub>): δ (ppm) 106.0, 109.6, 113.6, 121.2, 121.6, 123.4, 125.9, 130.6, 135.1, 140.6, 151.6. EI-MS (*m/z*): 309 (M<sup>+</sup>). Elemental Anal. Calcd for C<sub>21</sub>H<sub>15</sub>N<sub>3</sub>: C, 81.53; H, 4.89; N, 13.58. Found: C, 81.45; H, 4.81; N, 13.74.

**Precyclophane 11:** Yield 80%; mp 103-105 °C; <sup>1</sup>H NMR (300 MHz, CDCl<sub>3</sub>): δ (ppm) 6.68 (d, 2H, *J* = 3.3 Hz); 7.00 (s, 2H); 7.22 (d, 2H, *J* = 8.7 Hz); 7.27 (d, 2H, *J* = 8.4 Hz); 7.31 (d, 2H, *J* = 3.3 Hz); 7.66 (t, 4H, *J* = 7.5 Hz). <sup>13</sup>C NMR (75 MHz, CDCl<sub>3</sub>): δ (ppm) 104.7, 110.6, 119.4, 121.2, 121.3, 123.1, 129.1, 129.2, 137.2, 137.4. EI-MS (*m/z*): 314 (M<sup>+</sup>). Elemental Anal. Calcd for C<sub>20</sub>H<sub>14</sub>N<sub>2</sub>S: C, 76.40; H, 4.49; N, 8.91. Found: C, 76.28; H, 4.58; N, 8.76.

**Precyclophane 12:** Yield 64%; mp 211-213 °C; <sup>1</sup>H NMR (300 MHz, CDCl<sub>3</sub>): δ (ppm) 1.53 (t, 3H, *J* = 7.2 Hz); 4.46 (q, 2H, *J* = 7.2 Hz); 6.69 (d, 2H, *J* = 2.4 Hz); 7.14-7.23 (m, 4H); 7.40 (d, 2H, *J* = 3.0 Hz); 7.52-7.56 (m, 4H); 7.63 (d, 2H, *J* = 8.7 Hz); 7.71 (d, 2H, *J* = 7.2 Hz); 8.16 (s, 2H). <sup>13</sup>C NMR (75 MHz, CDCl<sub>3</sub>): δ (ppm) 13.9, 38.1, 102.9, 109.5, 110.4, 117.2, 120.1, 121.1, 122.2, 123.2, 123.8, 128.9, 129.0, 131.9, 136.8, 139.2. EI-MS (*m/z*): 425 (M<sup>+</sup>). Elemental Anal. Calcd for C<sub>30</sub>H<sub>23</sub>N<sub>3</sub>: C, 84.68; H, 5.45; N, 9.87. Found: C, 84.84; H, 5.38; N, 9.78.

**Dialdehyde 13:** Yield 78%; 198-200 °C; <sup>1</sup>H NMR (300 MHz, CDCl<sub>3</sub>): δ (ppm) 2.61 (s, 3H); 7.36-7.40 (m, 4H); 7.49 (s, 2H); 7.55-7.58 (m, 3H); 7.97 (s, 2H); 8.37-8.40 (m, 2H); 10.10 (s, 2H). <sup>13</sup>C NMR (75 MHz, CDCl<sub>3</sub>): δ (ppm) 21.6, 110.8, 118.1, 120.2, 122.5, 123.8, 124.9, 125.0, 125.7, 137.2, 137.7, 139.6, 142.5, 184.9. EI-MS (*m/z*): 378 (M<sup>+</sup>). Elemental Anal. Calcd for C<sub>25</sub>H<sub>18</sub>N<sub>2</sub>O<sub>2</sub>: C, 79.35; H, 4.79; N, 7.40. Found: C, 79.28; H, 4.84; N, 7.54.

**Dialdehyde 13a:** Yield 72%; mp 108-110 °C; <sup>1</sup>H NMR (300 MHz, CDCl<sub>3</sub>): δ (ppm) 2.52 (s, 3H); 2.98 (s, 3H); 7.39 (d, 6H, *J* = 3.0 Hz); 7.46 (s, 2H); 7.98 (s, 2H); 8.39 (d, 2H, *J* = 3.6 Hz); 10.14 (s, 2H). <sup>13</sup>C NMR (75 MHz, CDCl<sub>3</sub>): δ (ppm) 20.8, 61.4, 110.9, 120.1, 122.3, 123.6, 124.8,

125.1, 128.6, 132.0, 135.4, 137.9, 139.1, 148.3, 184.9. EI-MS ( $m/z$ ): 408 ( $M^+$ ). Elemental Anal. Calcd for  $C_{26}H_{20}N_2O_3$ : C, 76.45; H, 4.94; N, 6.86. Found: C, 76.59; H, 4.88; N, 6.74.

**Dialdehyde 14:** Yield 56%; mp 286-288 °C;  $^1H$  NMR (300 MHz,  $CDCl_3$ ):  $\delta$  (ppm) 7.42-7.45 (m, 5H); 7.65 (d, 2H,  $J = 7.8$  Hz); 8.11- 8.14 (m, 2H); 8.19 (d, 2H,  $J = 8.1$  Hz); 8.43 (d, 1H,  $J = 3.3$  Hz); 8.45 (s, 2H); 10.21 (s, 2H).  $^{13}C$  NMR (75 MHz,  $CDCl_3$ ):  $\delta_C$  110.8, 111.8, 116.8, 120.6, 122.3, 123.0, 124.0, 127.3, 130.4, 142.1, 158.2, 191.5. EI-MS ( $m/z$ ): 365 ( $M^+$ ). Elemental Anal. Calcd for  $C_{23}H_{15}N_3O_2$ : C, 75.60; H, 4.14; N, 11.50. Found: C, 75.68; H, 4.25; N, 11.36.

**Dialdehyde 15:** Yield 80%; mp 231-233 °C;  $^1H$  NMR (300 MHz,  $CDCl_3$ ):  $\delta$  (ppm) 7.16 (s, 2H); 7.34-7.37 (m, 4H); 7.55-7.58 (m, 2H); 7.88 (s, 2H); 8.30-8.33 (m, 2H); 10.07 (s, 2H).  $^{13}C$  NMR (75 MHz,  $CDCl_3$ ):  $\delta$  (ppm) 110.8, 121.7, 122.5, 124.2, 125.3, 125.4, 136.7, 138.3, 138.5, 147.8, 184.8. EI-MS ( $m/z$ ): 370 ( $M^+$ ). Elemental Anal. Calcd for  $C_{22}H_{14}N_2O_2S$ : C, 71.33; H, 3.81; N, 7.56. Found: C, 71.50; H, 3.74; N, 7.49.

**Dialdehyde 16:** Yield 56%; mp 221-223 °C;  $^1H$  NMR (300 MHz,  $CDCl_3$ ):  $\delta$  (ppm) 1.59 (t, 3H;  $J = 7.2$  Hz); 4.55 (q, 2H,  $J = 7.2$  Hz); 7.30-7.39 (m, 4H); 7.47 (d, 2H,  $J = 7.5$  Hz); 7.67 (s, 4H); 7.99 (s, 2H); 8.22 (s, 2H); 8.40 (d, 2H,  $J = 7.2$  Hz); 10.13 (s, 2H).  $^{13}C$  NMR (75 MHz,  $CDCl_3$ ):  $\delta$  (ppm) 13.9, 38.3, 110.1, 111.0, 117.7, 119.5, 122.2, 123.1, 123.4, 124.0, 124.5, 125.5, 130.4, 138.4, 138.8, 140.1, 184.9. EI-MS ( $m/z$ ): 481 ( $M^+$ ). Elemental Anal. Calcd for  $C_{32}H_{23}N_3O_2$ : C, 79.81; H, 4.81; N, 8.73. Found: C, 79.71; H, 4.90; N, 8.67.

**Ethylenophane 1:** Yield 17%; mp 238-240 °C;  $^1H$  NMR (300 MHz,  $CDCl_3$ ):  $\delta$  (ppm) 2.41 (s, 6H); 6.53 (s, 2H); 6.84 (s, 4H); 7.13-7.17 (m, 12H); 7.26 (s, 4H); 7.40 (d, 4H,  $J = 7.8$  Hz); 7.65 (d, 4H,  $J = 7.8$  Hz).  $^{13}C$  NMR (75 MHz,  $CDCl_3$ ):  $\delta$  (ppm) 21.58, 110.60, 115.5, 119.9, 120.4, 120.6, 121.8, 123.0, 126.2, 128.2, 135.2, 135.4, 140.5, 141.1; FAB-MS ( $m/z$ ): 692 ( $M^+$ ). Elemental Anal. Calcd for  $C_{50}H_{36}N_4$ : C, 86.68; H, 5.24; N, 8.09. Found: C, 86.82; H, 5.12; N, 8.20.

**Ethylenophane 1a:** Yield 18%; mp 184-186 °C;  $^1H$  NMR (300 MHz,  $CDCl_3$ ):  $\delta$  (ppm) 2.23 (s, 6H); 2.79 (s, 6H); 6.77 (s, 4H); 7.04 (s, 4H); 7.10 (d, 2H,  $J = 3.0$  Hz); 7.11 (s, 3H); 7.13 (d, 4H,  $J = 3.6$  Hz); 7.20-7.26 (m, 5H); 7.48 (s, 4H).  $^{13}C$  NMR (75 MHz,  $CDCl_3$ ):  $\delta$  (ppm) 20.59, 60.77, 110.46, 114.83, 119.20, 119.50, 120.44, 122.71, 127.16, 128.16, 128.39, 132.79, 134.00, 136.79, 148.96. FAB-MS ( $m/z$ ): 752 ( $M^+$ ). Elemental Anal. Calcd for  $C_{52}H_{40}N_4O_2$ : C, 82.95; H, 5.35; N, 7.44. Found: C, 82.82; H, 5.21; N, 7.30.

**Ethylenophane 2:** Yield 15%; mp 172-174 °C;  $^1H$  NMR (300 MHz,  $CDCl_3$ ):  $\delta$  (ppm) 6.77 (s, 4H); 7.01-7.11 (m, 12H); 7.28-7.35 (m, 6H); 7.58 (d, 4H,  $J = 7.2$  Hz); 8.08 (s, 4H).  $^{13}C$  NMR (75 MHz,  $CDCl_3$ ):  $\delta$  (ppm) 110.58, 113.62, 119.23, 119.28, 121.55, 123.47, 126.32, 129.49, 130.57, 135.31, 139.63, 151.2; FAB-MS ( $m/z$ ): 666 ( $M^+$ ). Elemental Anal. Calcd for  $C_{46}H_{30}N_6$ : C, 82.86; H, 4.54; N, 12.60. Found: C, 82.97; H, 4.42; N, 12.46.

**Ethylenophane 3:** Yield 20%; mp 252-254 °C;  $^1H$  NMR (300 MHz,  $CDCl_3$ ):  $\delta$  (ppm) 6.75 (s, 4H); 7.08 (s, 4H); 7.27-7.36 (m, 8H); 7.62 (d, 4H,  $J = 7.5$  Hz); 7.78 (d, 4H,  $J = 7.8$  Hz); 7.88 (s,

4H).  $^{13}\text{C}$  NMR (75 MHz,  $\text{CDCl}_3$ ):  $\delta$  (ppm) 110.66, 115.93, 118.49, 118.92, 119.30, 121.50, 123.78, 126.32, 129.09, 136.31, 136.36; FAB-MS ( $m/z$ ): 676 ( $\text{M}^+$ ). Elemental Anal. Calcd for  $\text{C}_{44}\text{H}_{28}\text{N}_4\text{S}_2$ : C, 78.08; H, 4.17; N, 8.28. Found: C, 77.95; H, 4.29; N, 8.40.

**Ethylenophane 4:** Yield 15%; mp 98-100 °C;  $^1\text{H}$  NMR (300 MHz,  $\text{CDCl}_3$ ):  $\delta$  (ppm) 1.58 (t, 6H,  $J = 7.2$  Hz) 4.87 (q, 4H,  $J = 7.2$  Hz); 6.82 (s, 4H); 7.14-7.19 (m, 8H); 7.22 (s, 4H); 7.51-7.56 (m, 8H); 7.61 (d, 4H,  $J = 2.1$  Hz); 7.65 (d, 4H,  $J = 7.8$  Hz); 8.13 (d, 4H,  $J = 2.1$  Hz).  $^{13}\text{C}$  NMR (75 MHz,  $\text{CDCl}_3$ ):  $\delta$  (ppm) 13.62, 37.73, 109.35, 110.23, 112.02, 114.54, 116.86, 119.11, 119.44, 122.14, 123.12, 123.60, 124.42, 126.65, 132.77, 138.98, 149.25. FAB-MS ( $m/z$ ): 898 ( $\text{M}^+$ ). Elemental Anal. Calcd for  $\text{C}_{64}\text{H}_{46}\text{N}_6$ : C, 85.50; H, 5.16; N, 9.35. Found: C, 85.63; H, 5.04; N, 9.50.

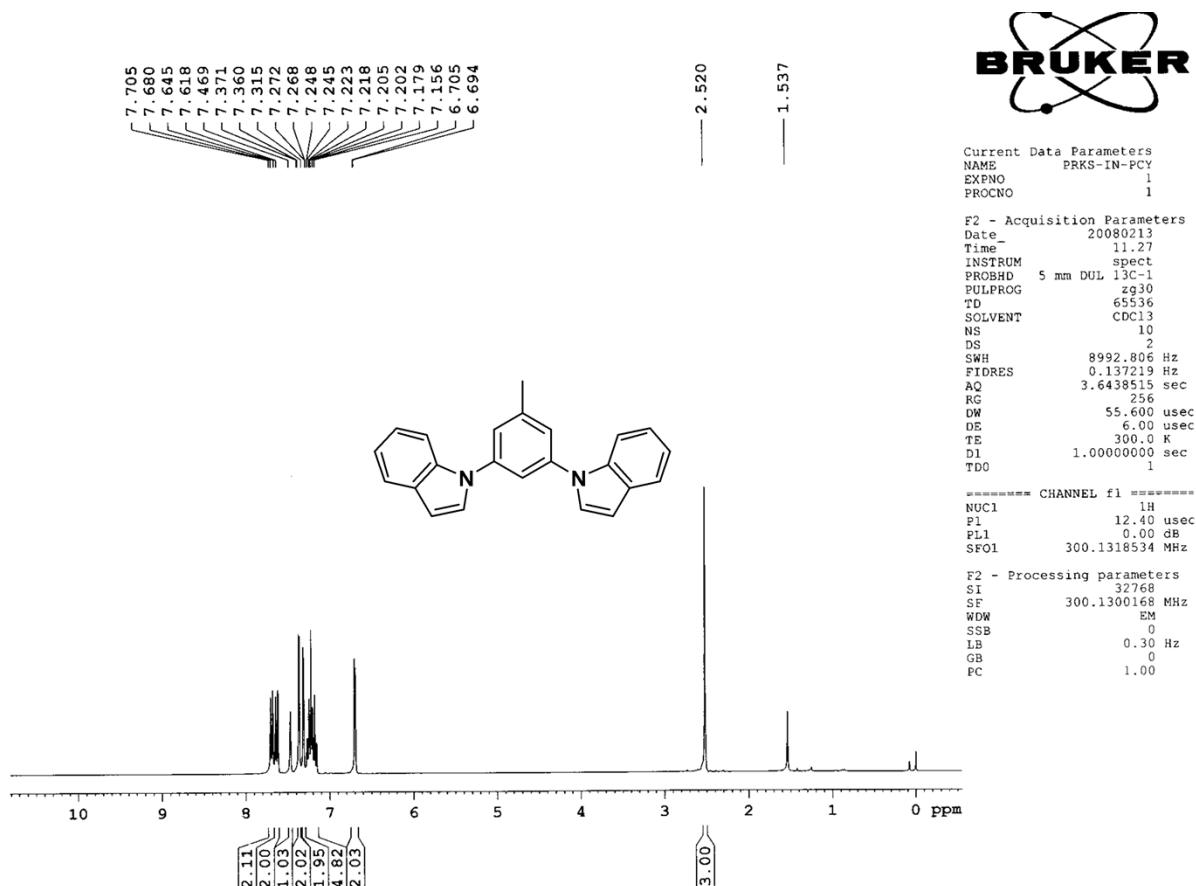

$^1\text{H}$  NMR spectrum (300 MHz,  $\text{CDCl}_3$ ) of precyclophane 9

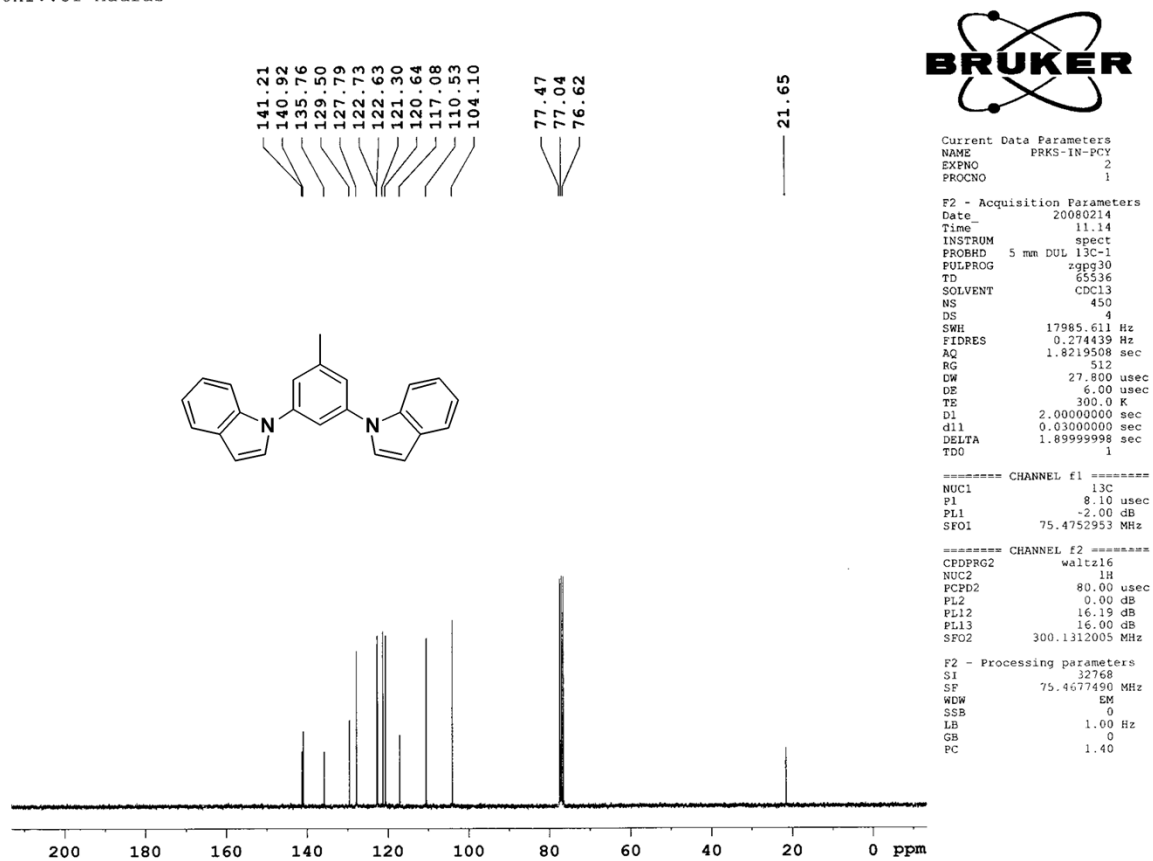

<sup>13</sup>C NMR spectrum (75 MHz, CDCl<sub>3</sub>) of precyclophane 9

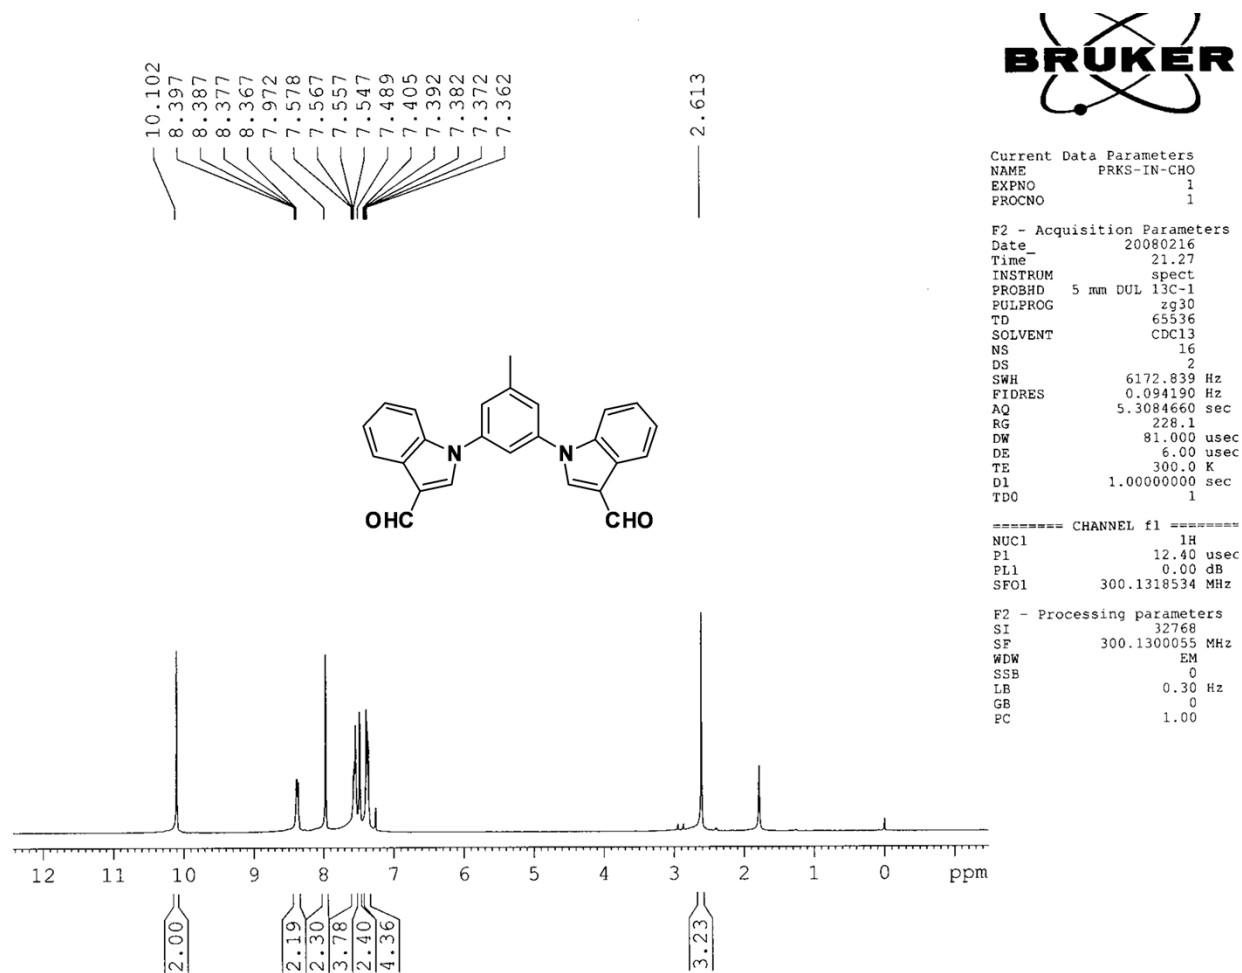

**<sup>1</sup>H NMR spectrum (300 MHz, CDCl<sub>3</sub>) of dialdehyde 13**



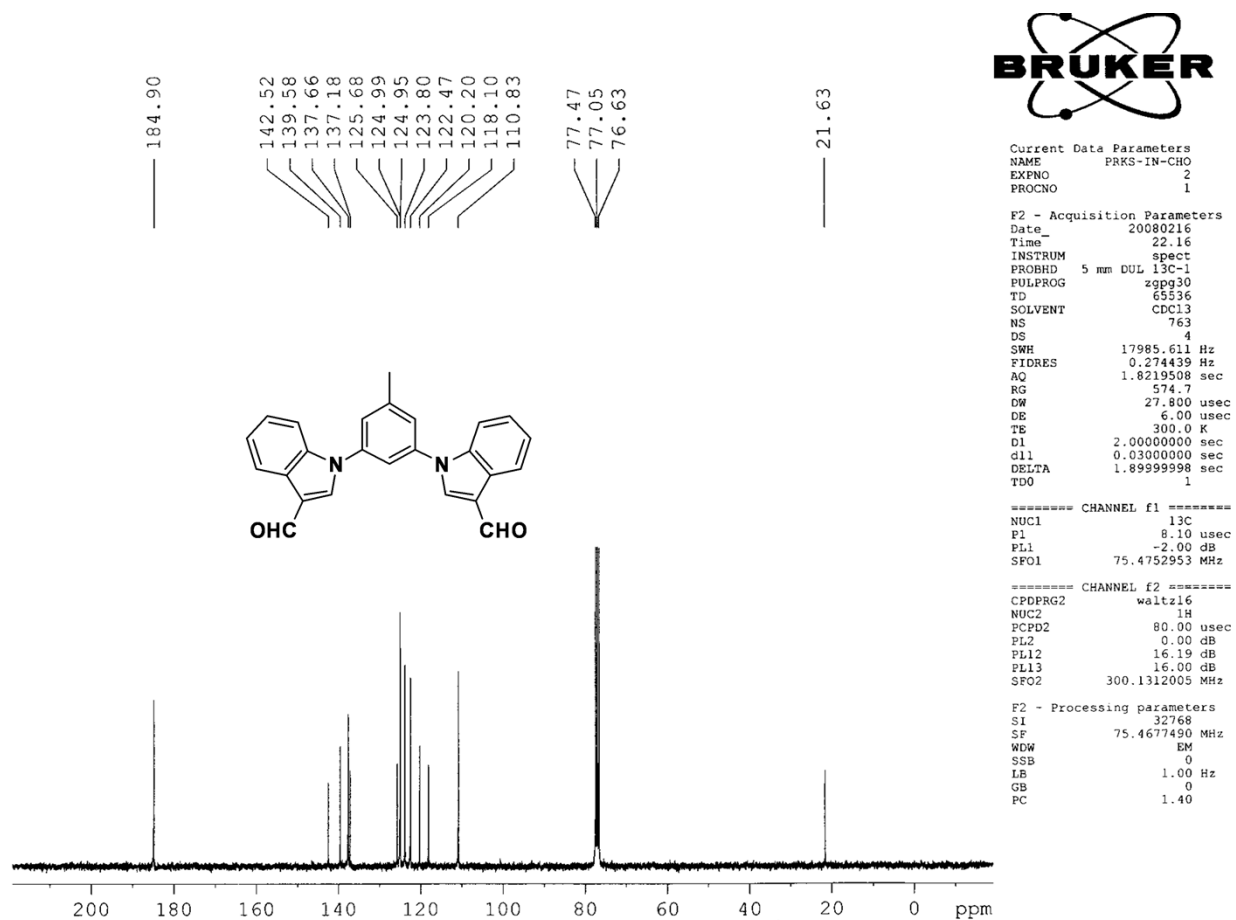

**<sup>13</sup>C NMR spectrum (75 MHz, CDCl<sub>3</sub>) of dialdehyde 13**

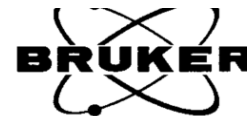

Current Data Parameters  
 NAME PRNV-CY-Me  
 EXPNO 1  
 PROCNO 1

F2 - Acquisition Parameters  
 Date\_ 20081129  
 Time 13.57  
 INSTRUM spect  
 PROBHD 5 mm DUL 13C-1  
 PULPROG zg30  
 TD 65536  
 SOLVENT CDCl3  
 NS 16  
 DS 2  
 SWH 6172.839 Hz  
 FIDRES 0.094190 Hz  
 AQ 5.3084660 sec  
 RG 1448.2  
 DW 81.000 usec  
 DE 6.00 usec  
 TE 300.0 K  
 D1 1.00000000 sec  
 TDO 1

===== CHANNEL f1 =====  
 NUC1 1H  
 P1 12.40 usec  
 PL1 0.00 dB  
 SFO1 300.1318534 MHz

F2 - Processing parameters  
 SI 32768  
 SF 300.1300049 MHz  
 WDW EM  
 SSB 0  
 LB 0.30 Hz  
 GB 0  
 PC 1.00

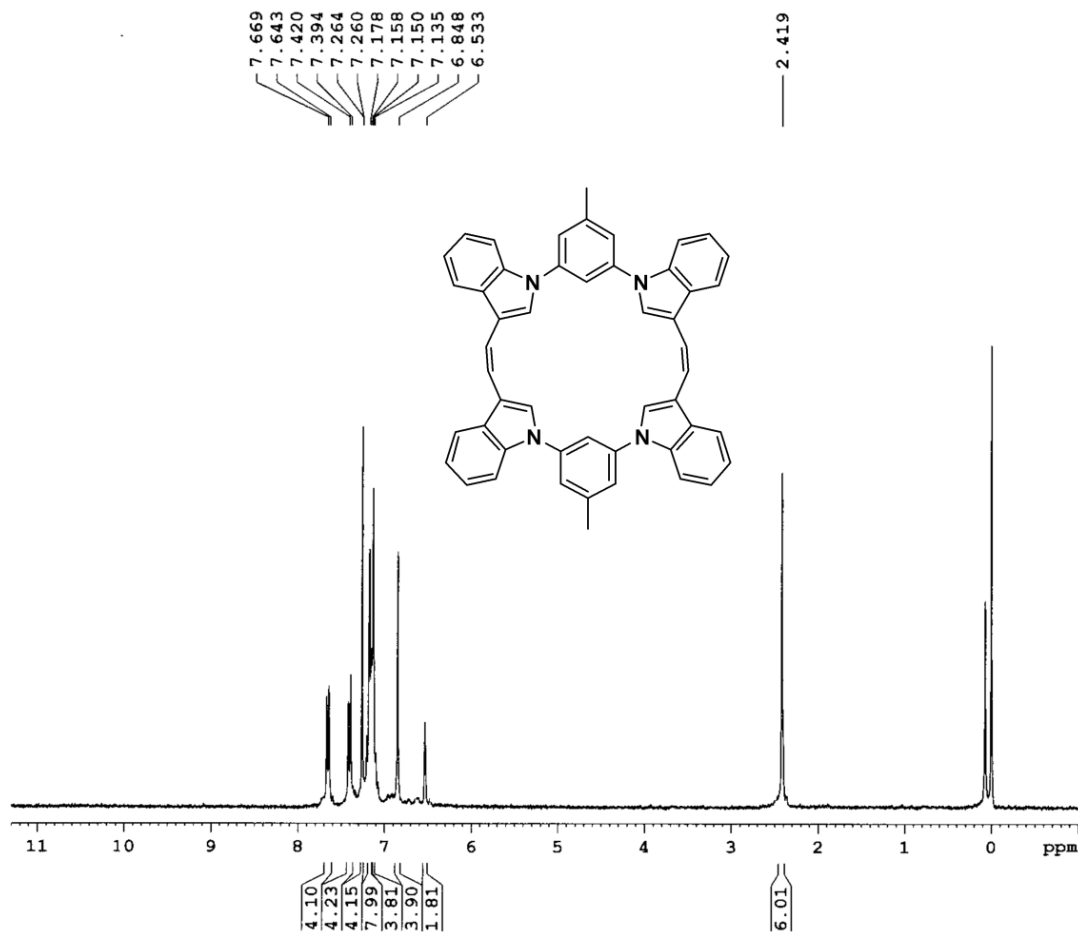

<sup>1</sup>H NMR spectrum (300 MHz, CDCl<sub>3</sub>) of Ethylenophane 1

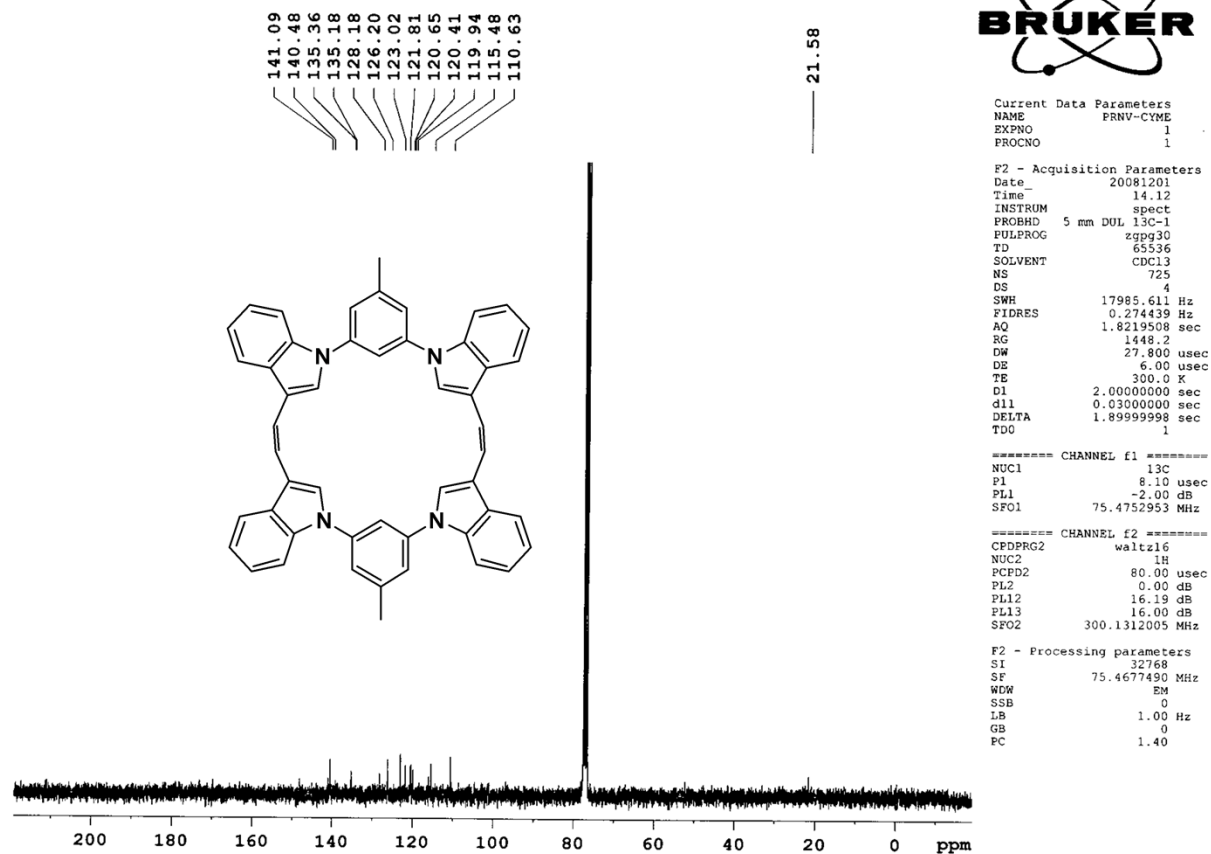

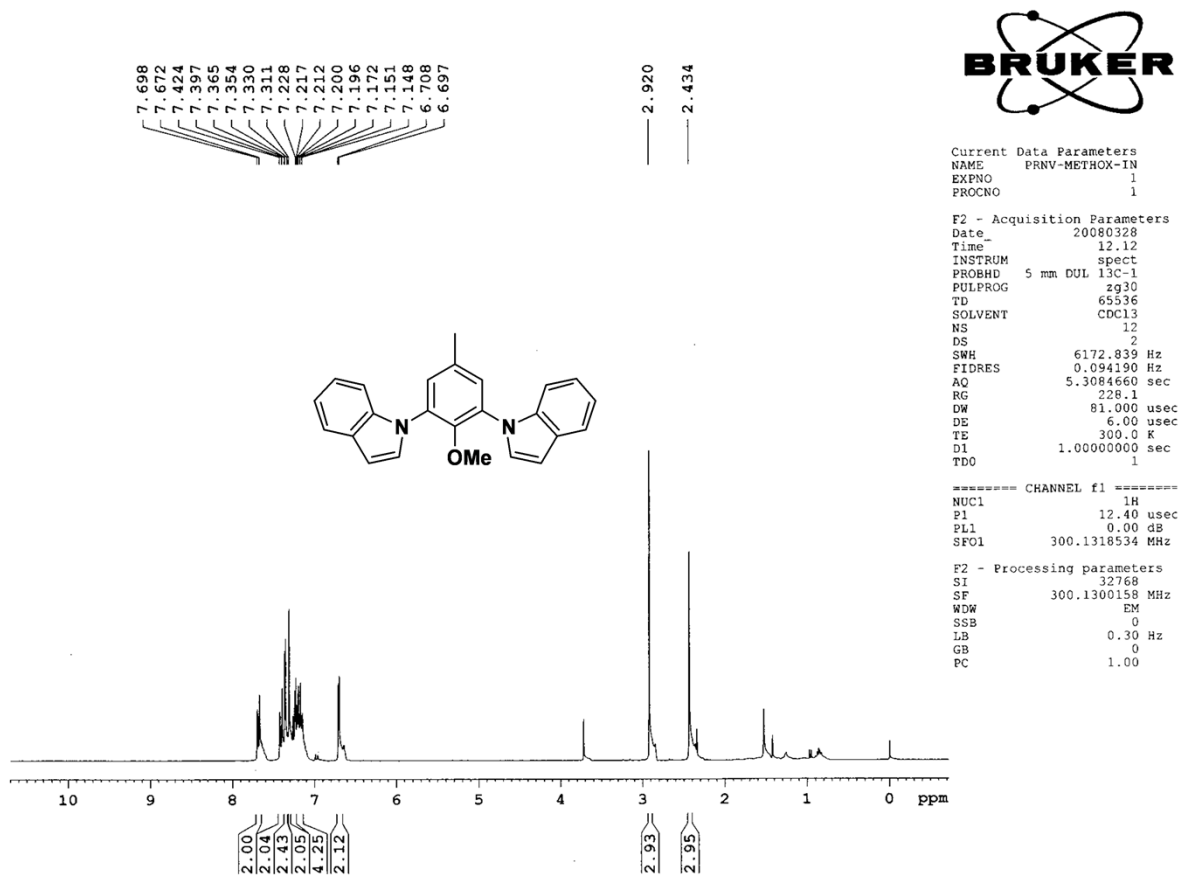

**<sup>1</sup>H NMR spectrum (300 MHz, CDCl<sub>3</sub>) of precyclophane 9a**

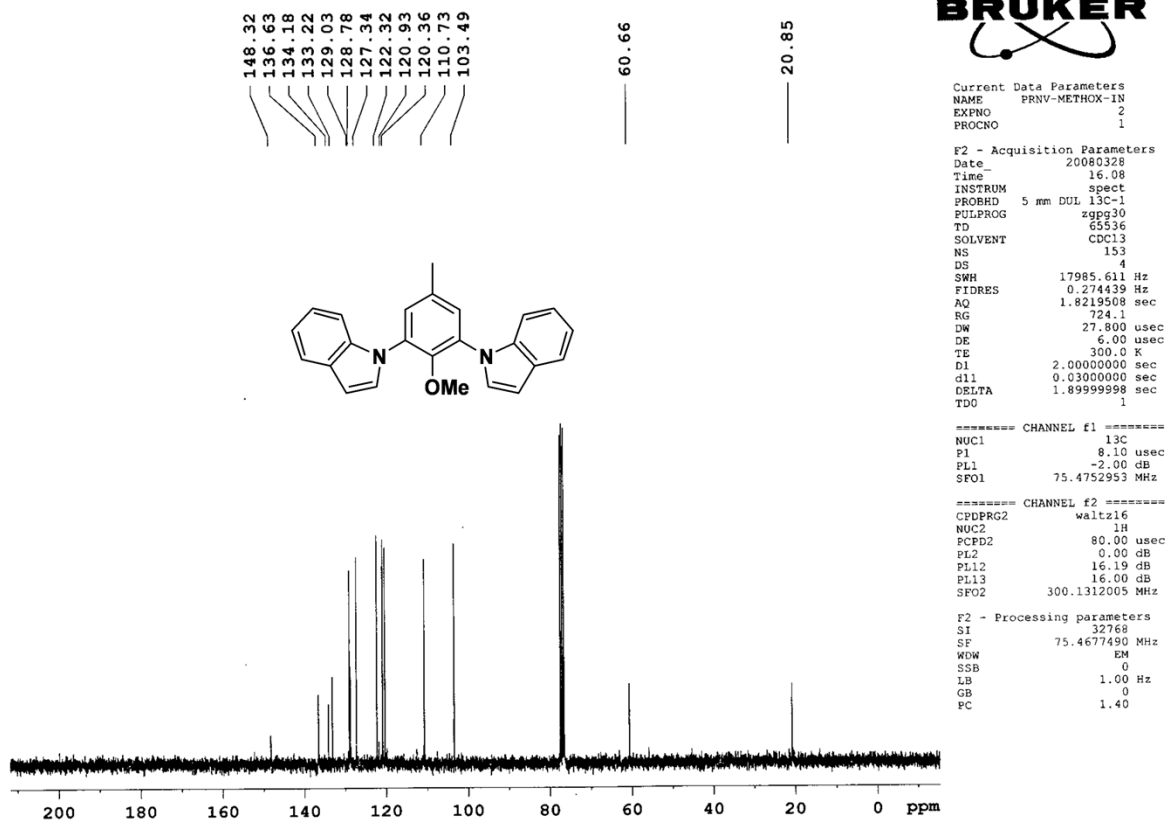<sup>13</sup>C NMR spectrum (75 MHz, CDCl<sub>3</sub>) of precyclophane 9a

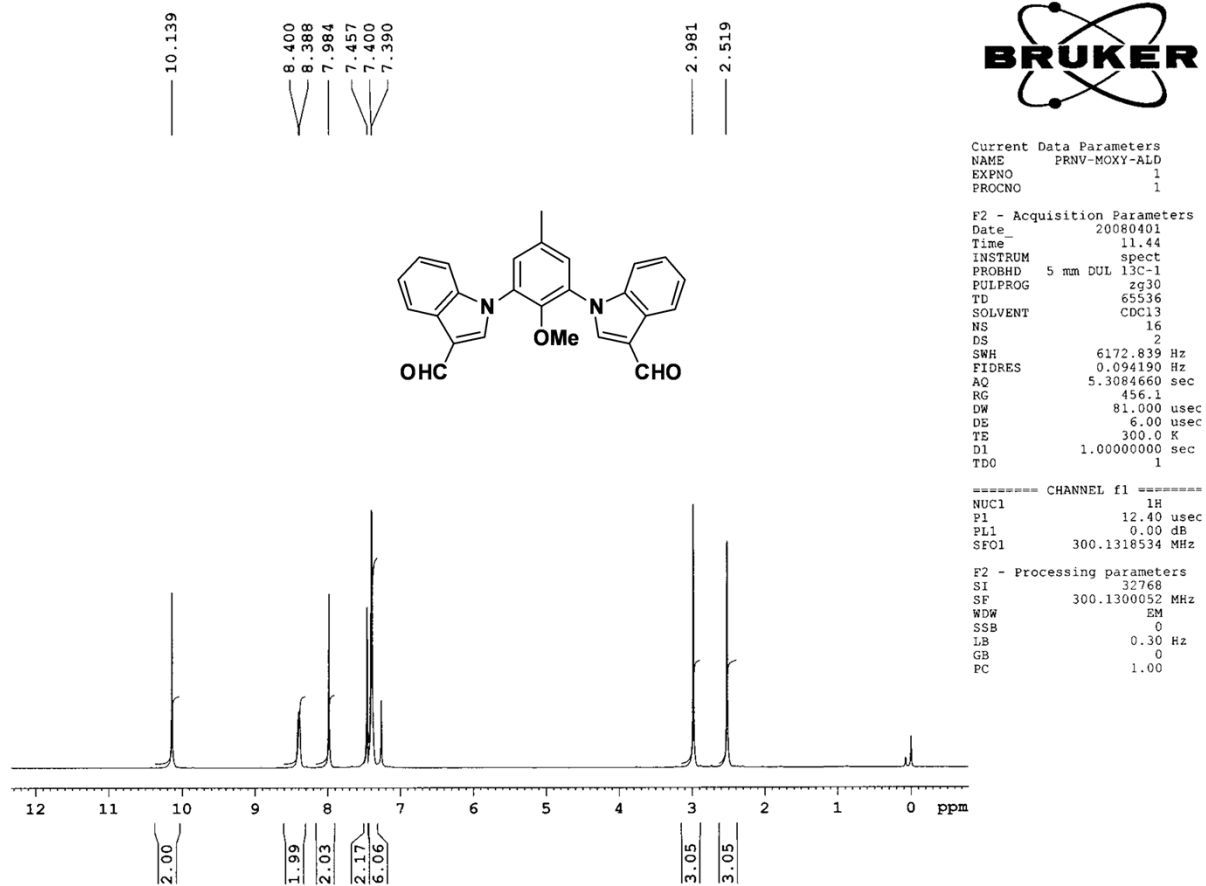

**<sup>1</sup>H NMR spectrum (300 MHz, CDCl<sub>3</sub>) of dialdehyde 13a**

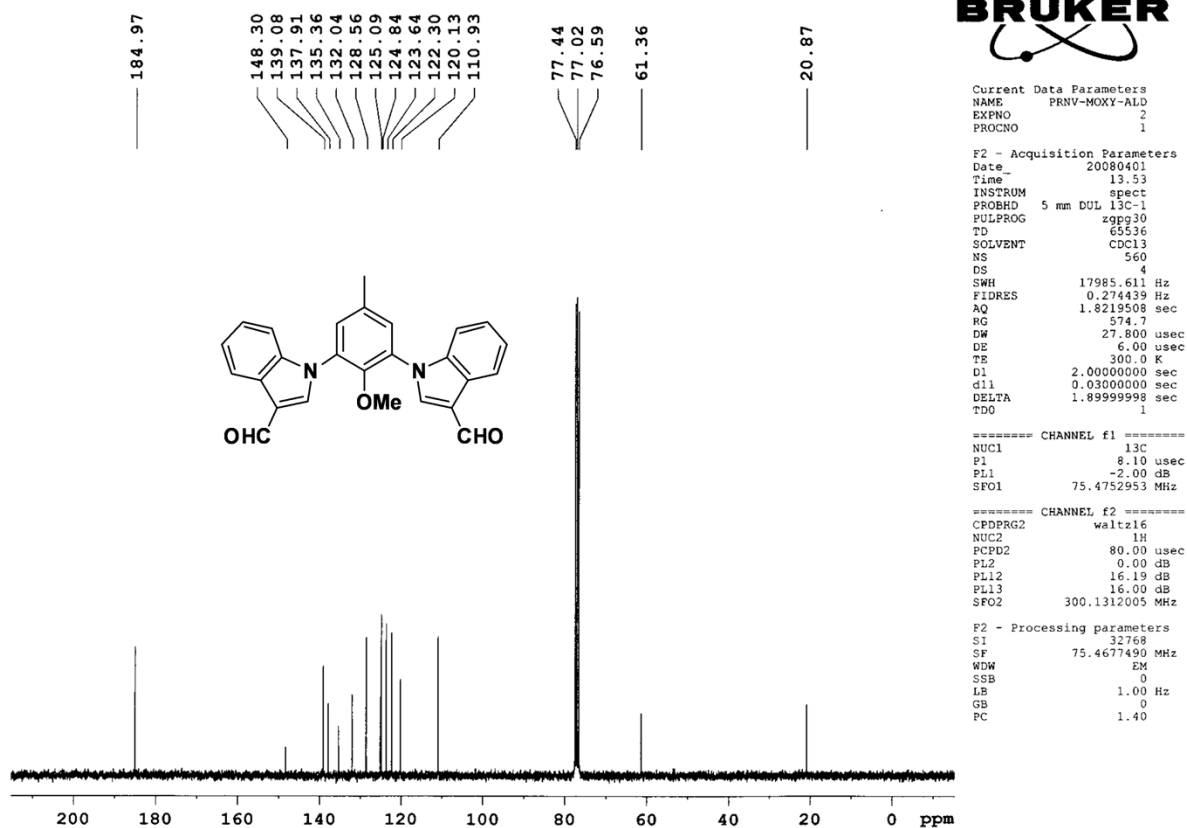

<sup>13</sup>C NMR spectrum (75 MHz, CDCl<sub>3</sub>) of dialdehyde 13a

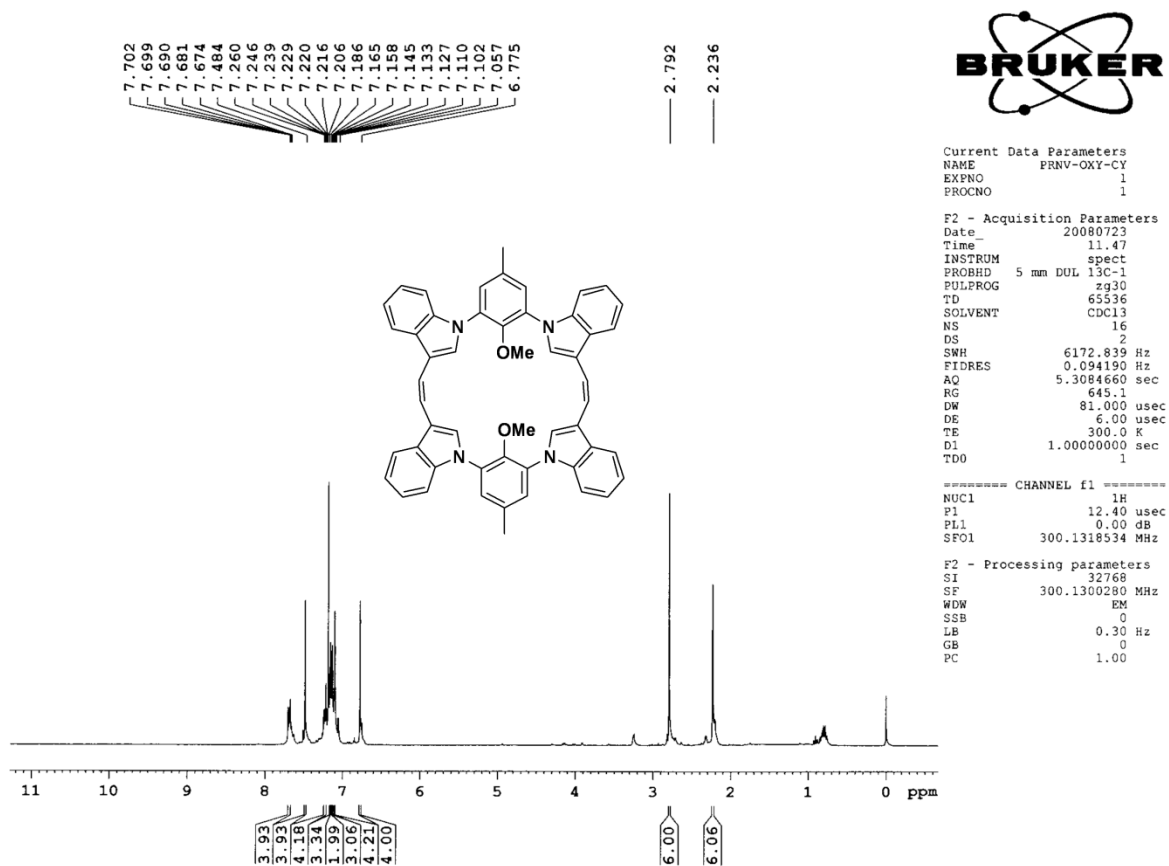

**<sup>1</sup>H NMR spectrum (300 MHz, CDCl<sub>3</sub>) of Ethylenophane 1a**



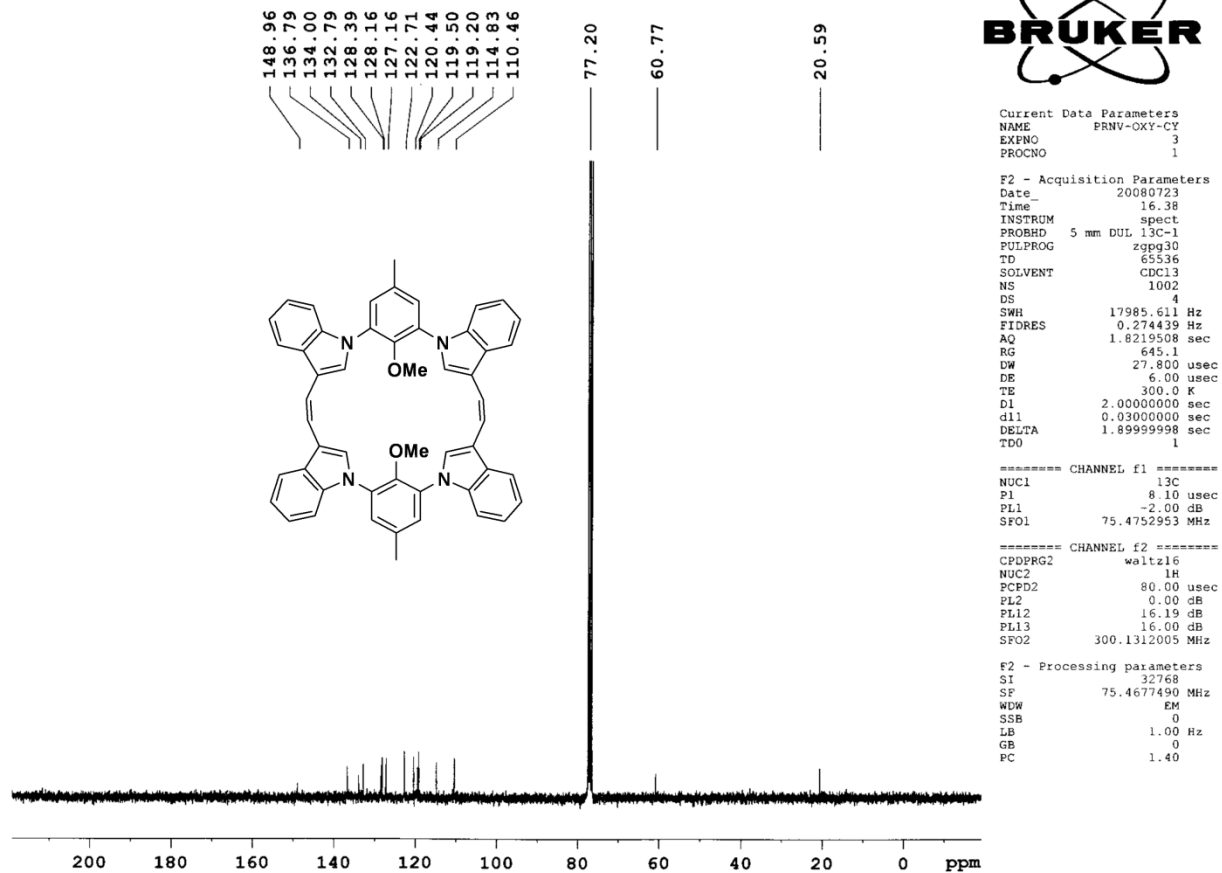

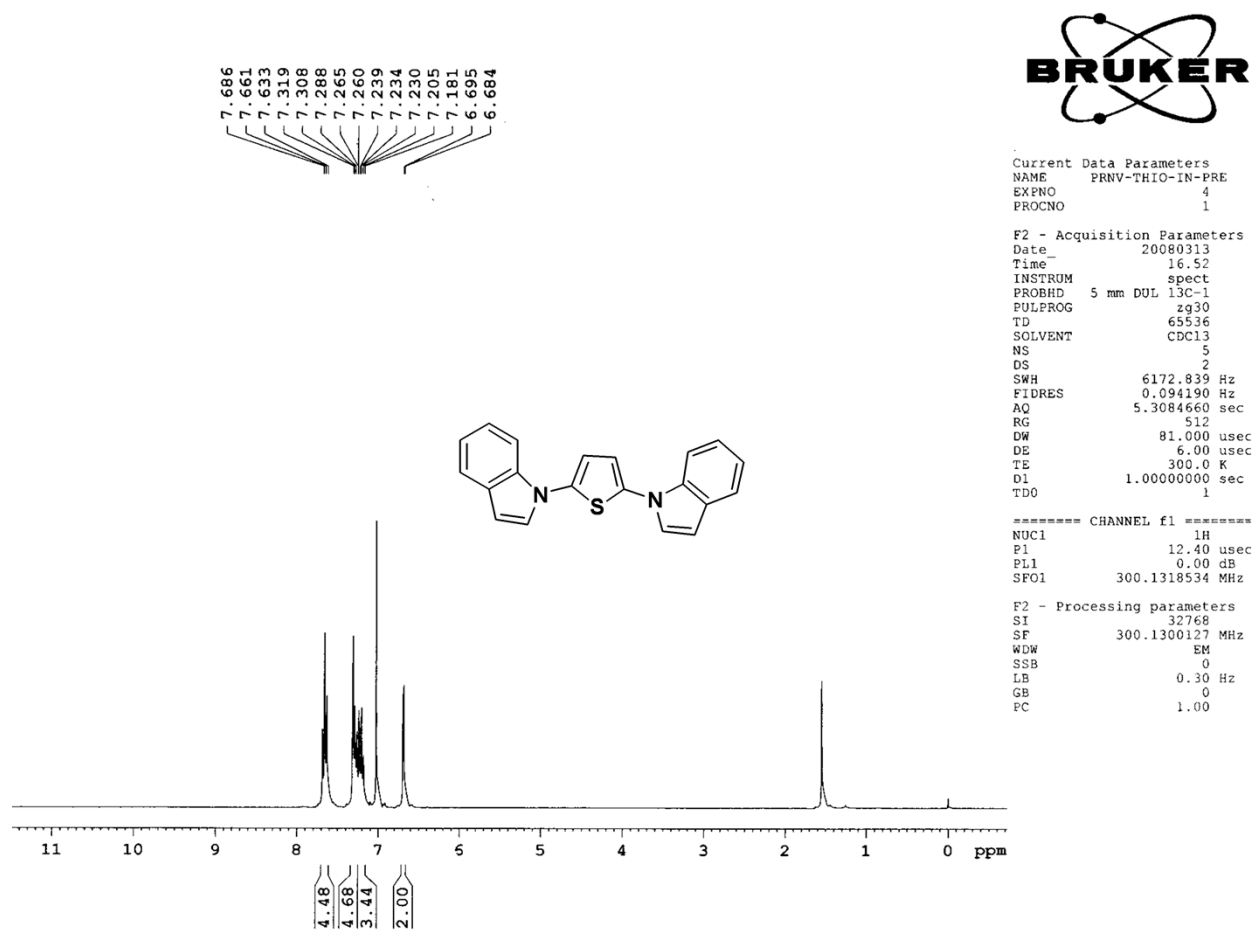

**<sup>1</sup>H NMR spectrum (300 MHz, CDCl<sub>3</sub>) of precyclophane 11**

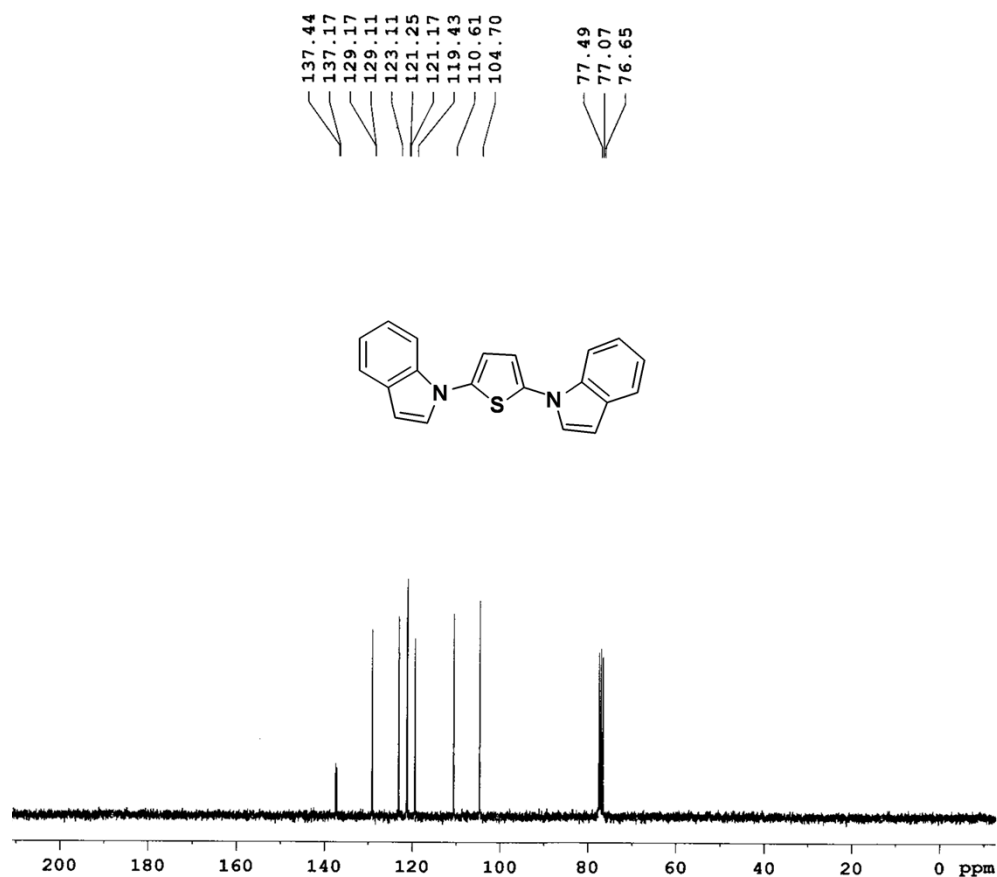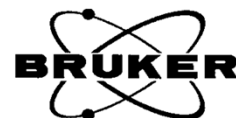

Current Data Parameters  
NAME PRNV-THIO-IN-PRE  
EXPNO 3  
PROCNO 1

F2 - Acquisition Parameters  
Date\_ 20080311  
Time 15.53  
INSTRUM spect  
PROBHD 5 mm DUL 13C-1  
PULPROG zgpg30  
TD 65536  
SOLVENT CDCl3  
NS 143  
DS 4  
SWH 17985.611 Hz  
FIDRES 0.274439 Hz  
AQ 1.8219508 sec  
RG 362  
DW 27.800 usec  
DE 6.00 usec  
TE 300.0 K  
d1 2.0000000 sec  
d11 0.0300000 sec  
DELTA 1.8999998 sec  
TD0 1

===== CHANNEL f1 =====  
NUC1 13C  
P1 8.10 usec  
PL1 -2.00 dB  
SFO1 75.4752953 MHz

===== CHANNEL f2 =====  
CPDPRG2 waltz16  
NUC2 1H  
PCPD2 80.00 usec  
PL2 0.00 dB  
PL12 16.19 dB  
PL13 16.00 dB  
SFO2 300.1312005 MHz

F2 - Processing parameters  
SI 32768  
SF 75.4677490 MHz  
WDW EM  
SSB 0  
LB 1.00 Hz  
GB 0  
PC 1.40

<sup>13</sup>C NMR spectrum (75 MHz, CDCl<sub>3</sub>) of precyclophane 11

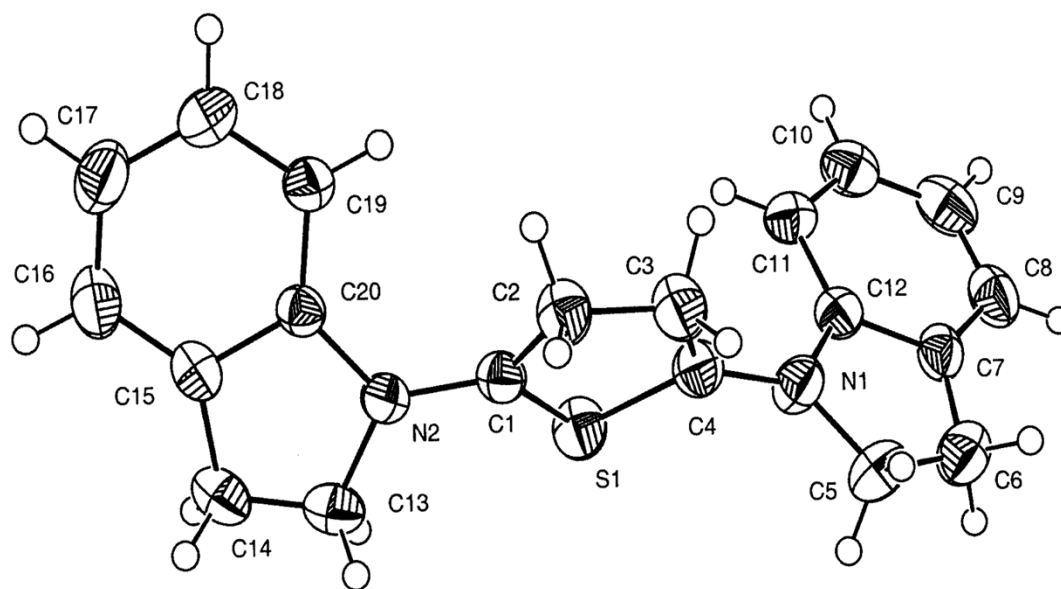

**Figure S1.** The XRD-single crystal structure of precyclophane 11

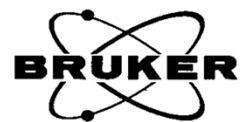

Current Data Parameters  
 NAME PRNV-THIO-IN-ALD  
 EXPNO 1  
 PROCNO 1

F2 - Acquisition Parameters  
 Date\_ 20080314  
 Time 14.50  
 INSTRUM spect  
 PROBHD 5 mm DUL 13C-1  
 PULPROG zg30  
 TD 65536  
 SOLVENT CDCl3  
 NS 16  
 DS 2  
 SWH 6172.839 Hz  
 FIDRES 0.094190 Hz  
 AQ 5.3084660 sec  
 RG 574.7  
 DW 81.000 usec  
 DE 6.00 usec  
 TE 300.0 K  
 D1 1.00000000 sec  
 TDO 1

===== CHANNEL f1 =====  
 NUC1 1H  
 P1 12.40 usec  
 PL1 0.00 dB  
 SFO1 300.1318534 MHz

F2 - Processing parameters  
 SI 32768  
 SF 300.1300271 MHz  
 WDW EM  
 SSB 0  
 LB 0.30 Hz  
 GB 0  
 PC 1.00

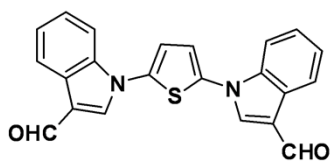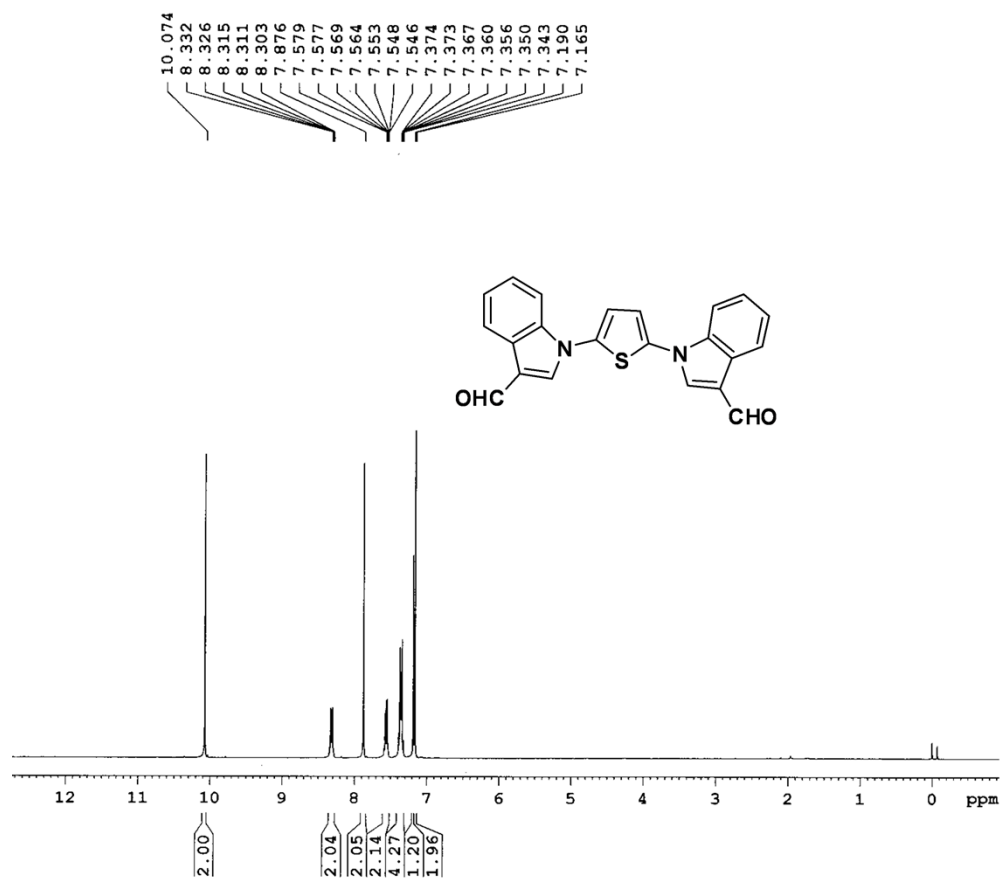

<sup>1</sup>H NMR spectrum (300 MHz, CDCl<sub>3</sub>) of dialdehyde 15

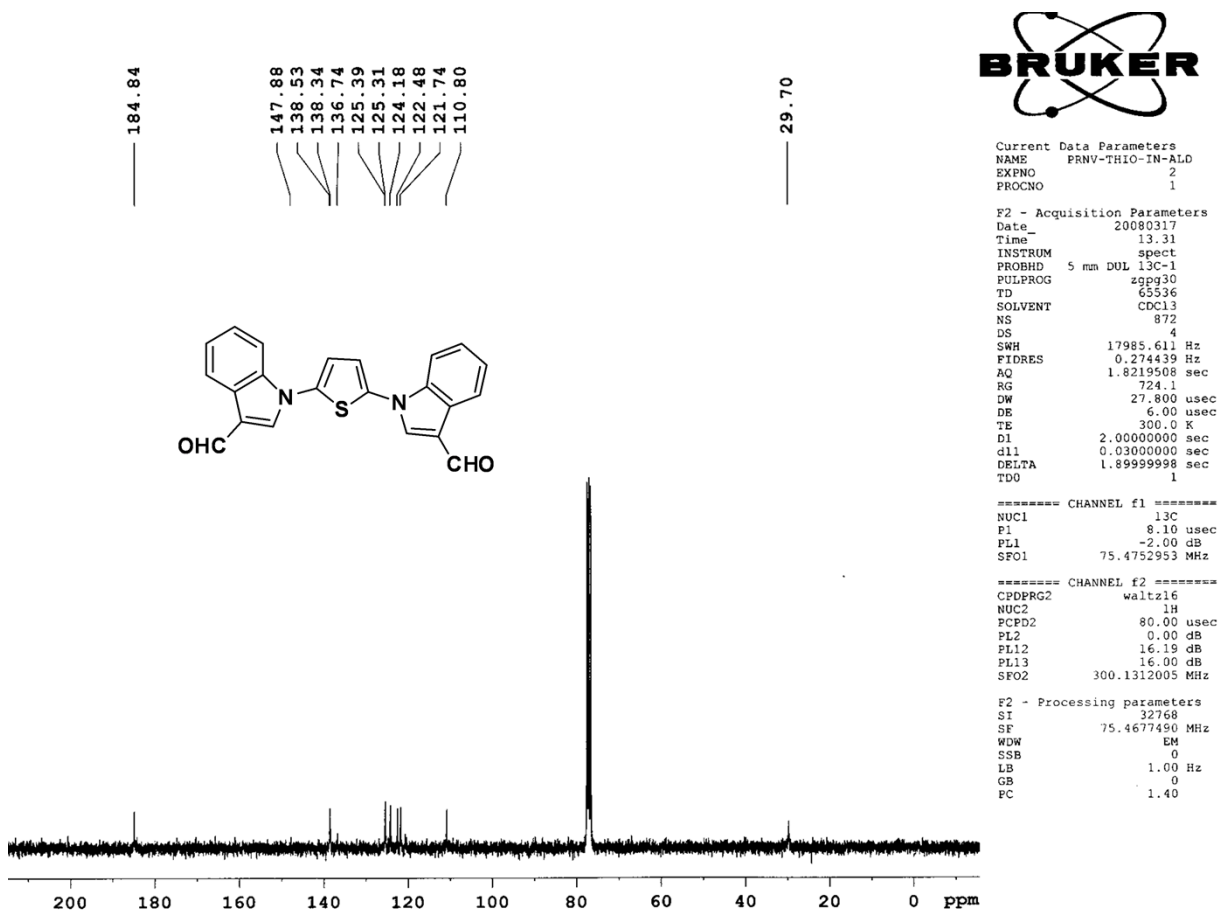

**$^{13}\text{C}$  NMR spectrum (75 MHz,  $\text{CDCl}_3$ ) of dialdehyde 15**

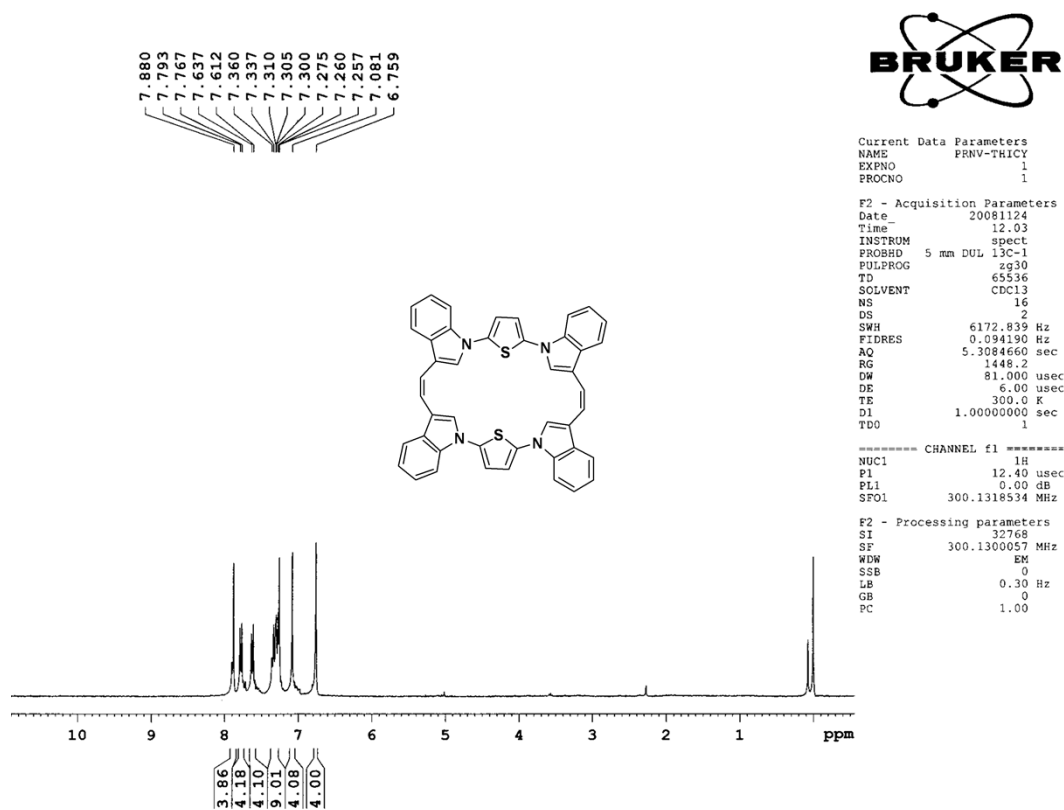

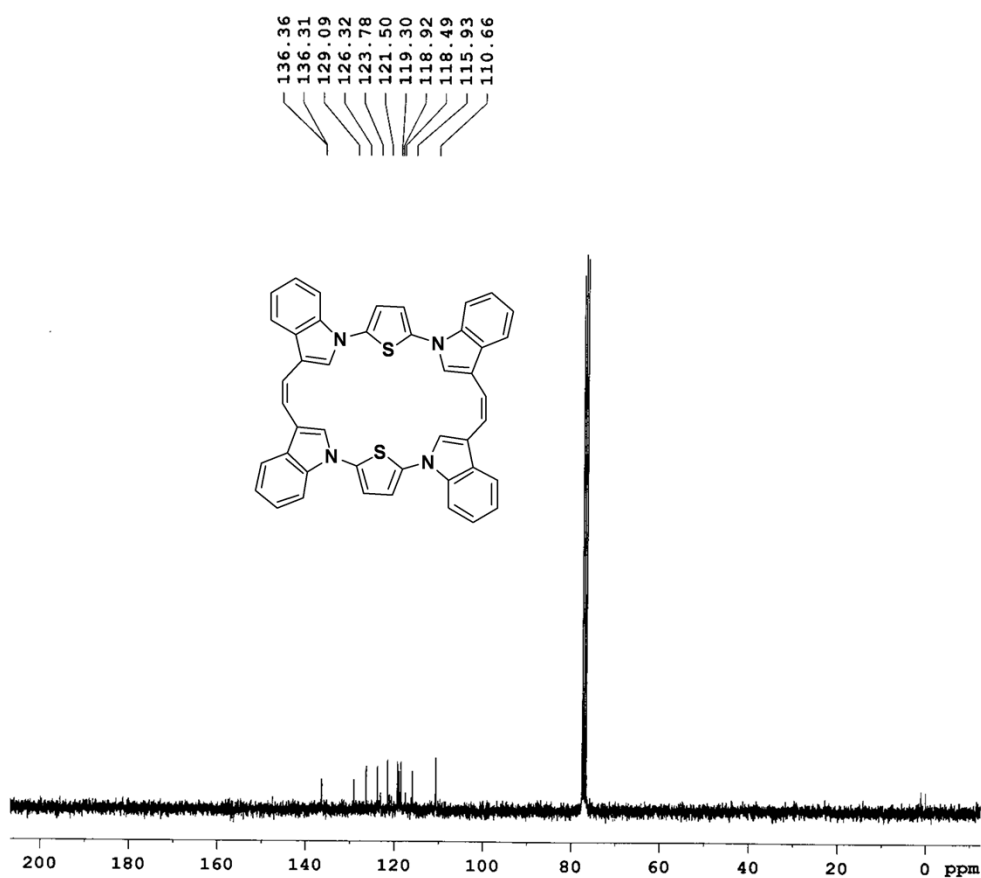

<sup>13</sup>C NMR spectrum (75 MHz, CDCl<sub>3</sub>) of Ethylenophane 3

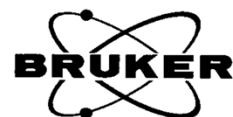

```

Current Data Parameters
NAME      PRNV-THICY
EXPNO     3
PROCNO    1

F2 - Acquisition Parameters
Date_     20081124
Time      17.15
INSTRUM   spect
PROBHD    5 mm DUL 13C-1
PULPROG   zgpg30
TD         65536
SOLVENT   CDCl3
NS         300
DS         4
SWH        17985.611 Hz
FIDRES     0.274439 Hz
AQ         1.8219508 sec
RG          645.1
DW         27.800 usec
DE          6.00 usec
TE         300.0 K
D1         2.00000000 sec
d11        0.03000000 sec
DELTA      1.89999998 sec
TD0        1

===== CHANNEL f1 =====
NUC1       13C
P1         8.10 usec
PL1        -2.00 dB
SFO1       75.4752953 MHz

===== CHANNEL f2 =====
CPDPRG2   waltz16
NUC2       1H
PCPD2      80.00 usec
PL2        0.00 dB
PL12       16.19 dB
PL13       16.00 dB
SFO2       300.1312005 MHz

F2 - Processing parameters
SI         32768
SF         75.4677490 MHz
WDW        EM
SSB        0
LB         1.00 Hz
GB         0
PC         1.40

```



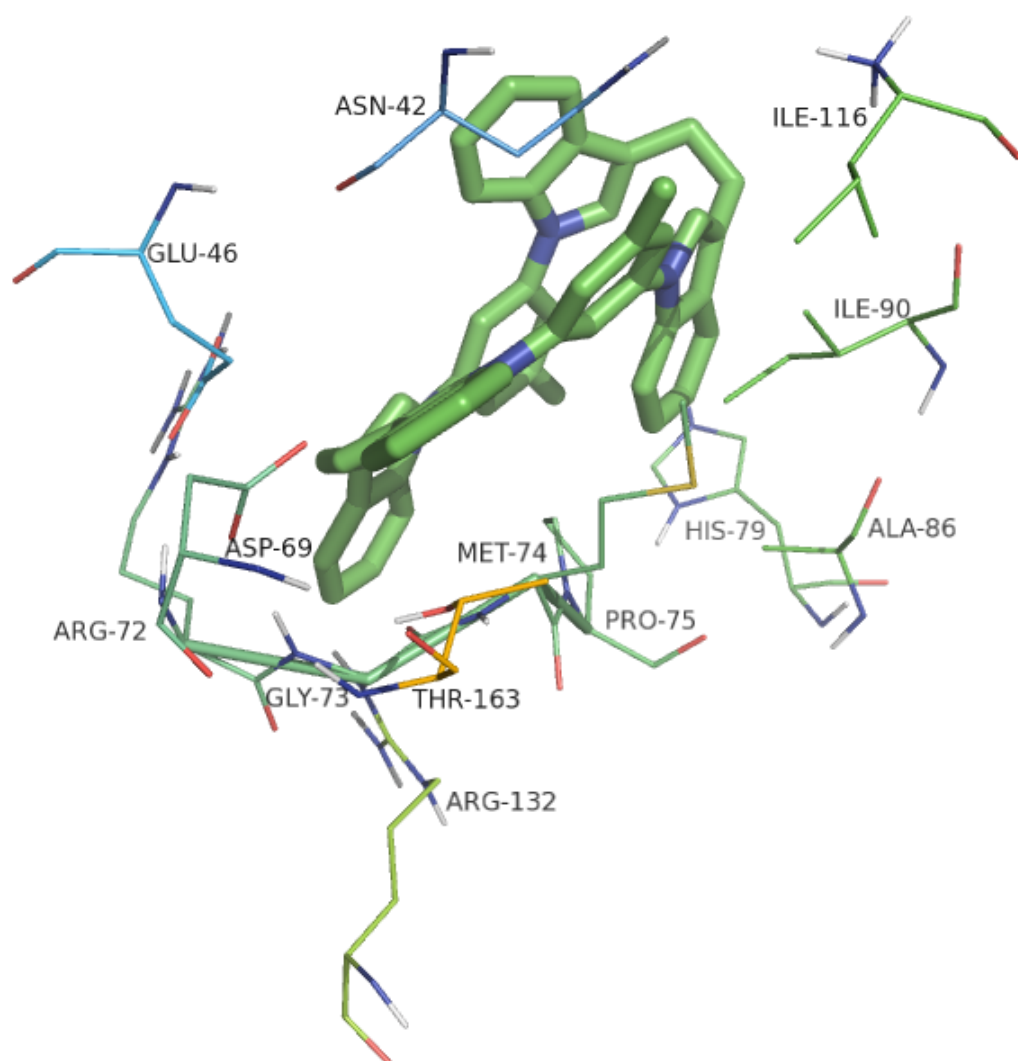

**Figure S2.** Binding of Ligand (Ethylenophane **1**) with the A chain amino acids of bacterial enzyme Topoisomerase IV (PDB ID: 3FV5).

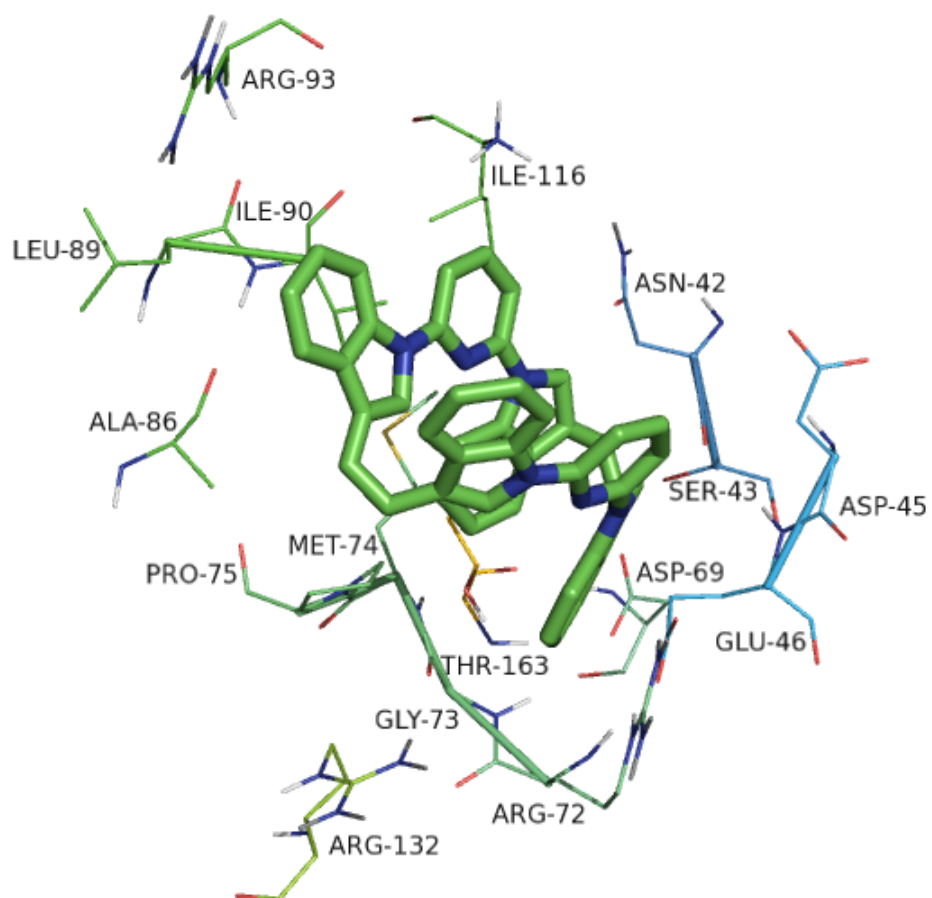

**Figure S3.** Binding of Ligand (Ethylenophane **2**) with the A chain amino acids of bacterial enzyme Topoisomerase IV (PDB ID: 3FV5).

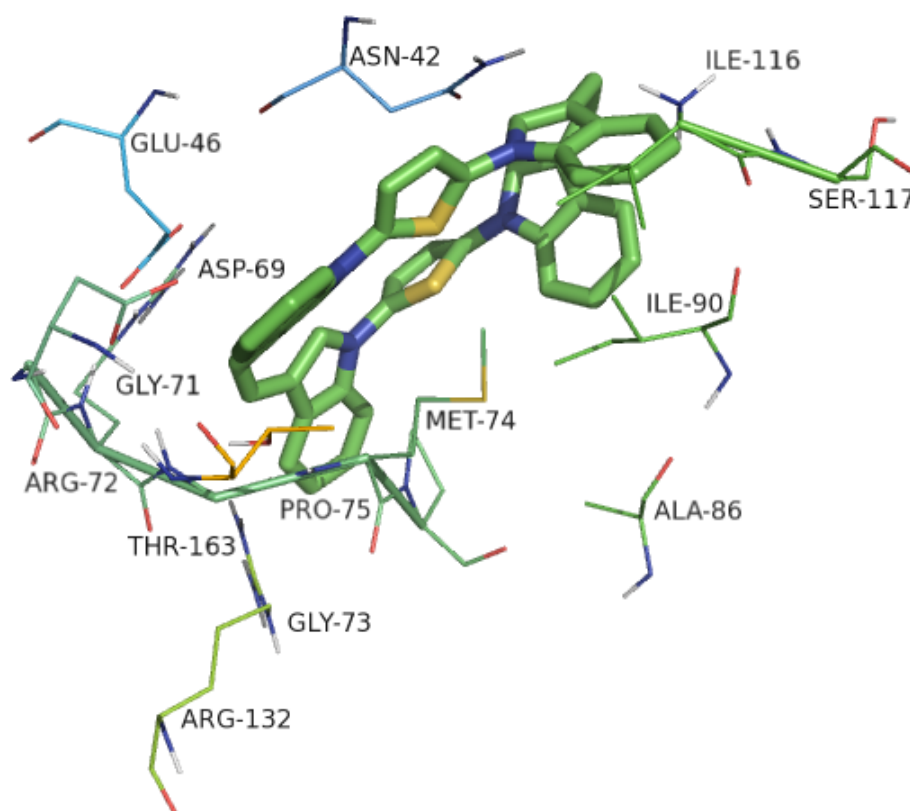

**Figure S4.** Binding of Ligand (Ethylenophane **3**) with the A chain amino acids of bacterial enzyme Topoisomerase IV (PDB ID: 3FV5).

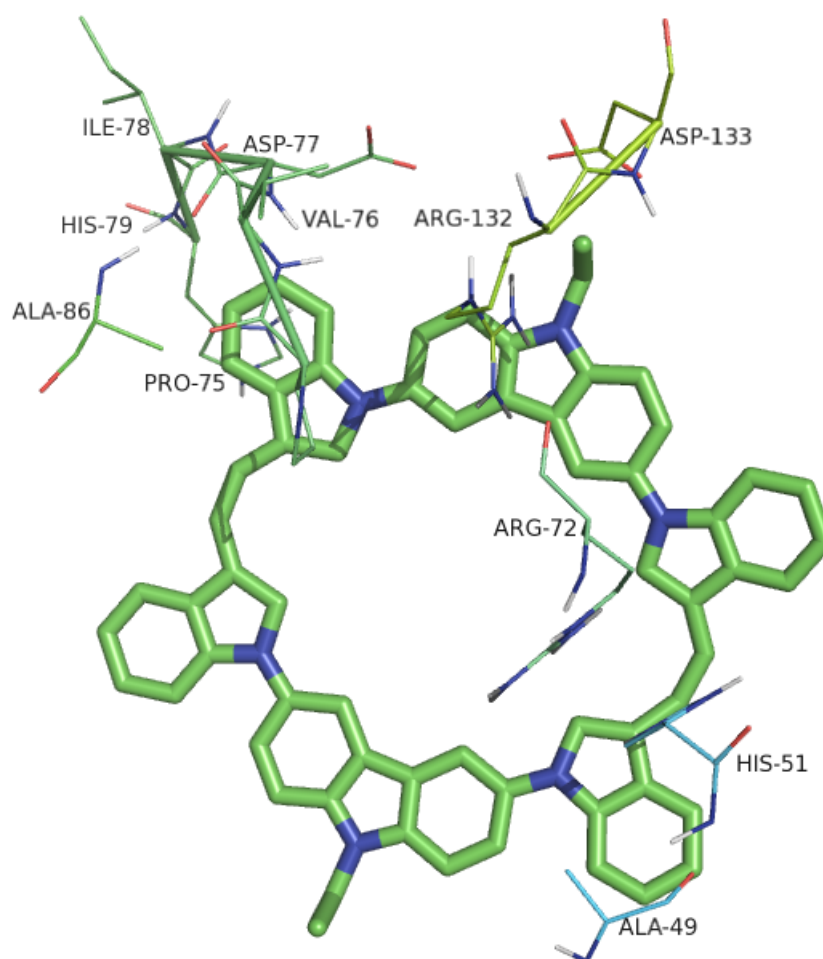

**Figure S5.** Binding of Ligand (Ethlenophane **4**) with the A chain amino acids of bacterial enzyme Topoisomerase IV (PDB ID: 3FV5).
